# Supplementary material
Source: PubMed Central journal article supplement (PMC2504032)

**Control Cocaine**

**ATF4**

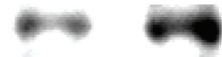

**$\alpha$ -Tubulin**

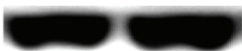

**ATF4 (Relative expression)**

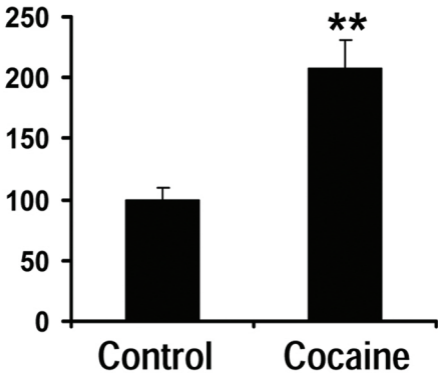

Supplement: pmed.0050117.sg006.pdf [file pmed.0050117.sg006.pdf]
